# Supplementary material
Source: PubMed Central journal article supplement (PMC3593761)
Supplement: NIHMS410940-supplement-01.pdf [file NIHMS410940-supplement-01.pdf]

## Supplemental Figure 1

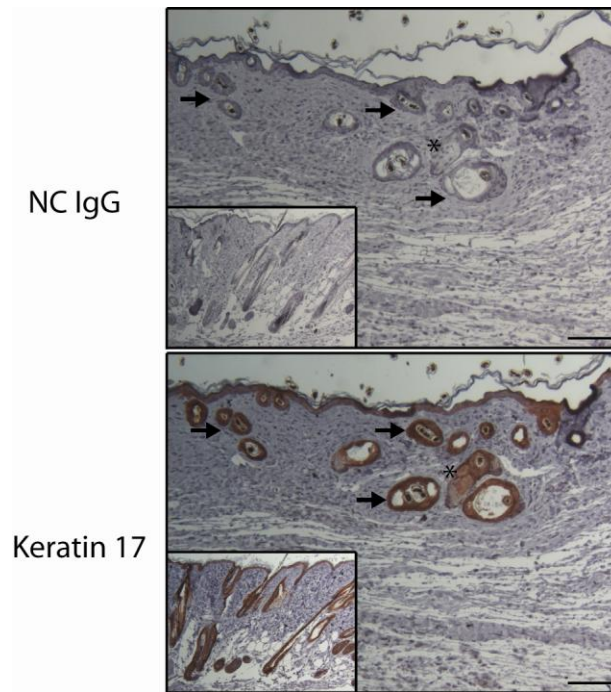

**Cytokeratin 17-positive follicles present within scar in C57BL/6J mice.** Photomicrographs show cross-sectional histology of C57BL/6J strain regenerated skin ~12 days after wounding. Note K17-positive wound induced hair neogenesis (WIHN) indicated by the arrows. Sebaceous glands also form *de novo* after wounding (\*). Depicted in insets are hair follicles within normal unwounded skin identified by positive cytokeratin 17 (K17) staining. This corroborates our use of whole-mount cytokeratin 17 immunohistochemistry shown in Fig 2a. Scale bar = 100µm.

Supplemental Figure 2

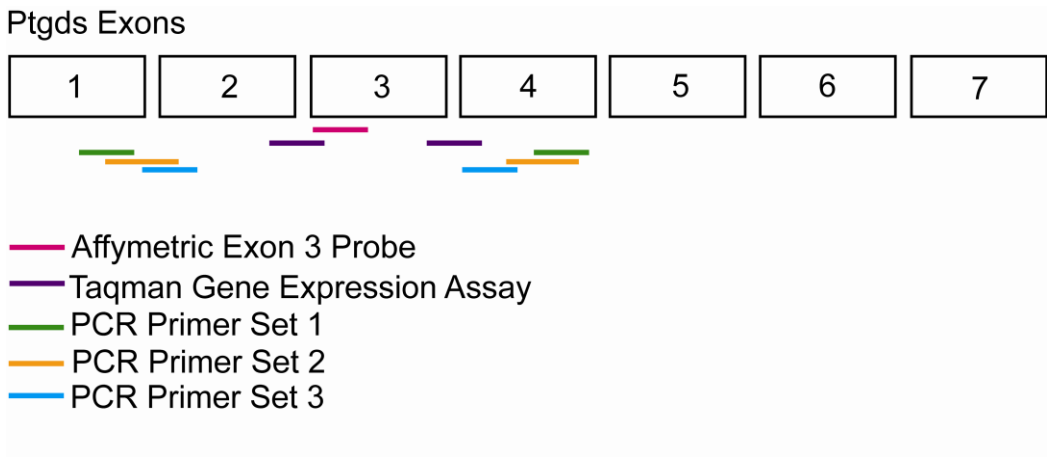

Diagram representation showing location of all gene expression probes and PCR primers used in *Ptgds* splice variant analysis.

## Supplemental Figure 3

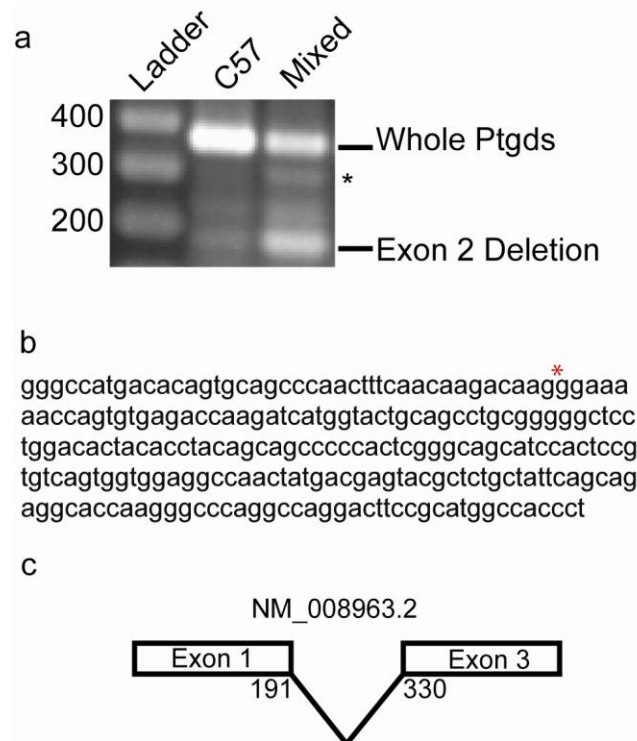

**Sequencing of additional *PtgdS* splice variants demonstrates increased quantity of spliced transcript with complete removal of Exon 2 preferentially in Mixed strain mice.**

**(a)** Representative PCR agarose gel depicting alternative splicing of *PtgdS* in mouse strains. Complete *PtgdS* is found in C57BL/6J, while spliced *PtgdS* products are more abundant in the Mixed strain **(b)** DNA sequencing was performed for the following band sizes: 371bp (Whole), and approximately 200bp. DNA sequence as determined by Sanger sequencing listed is that for ~200bp band missing exon 2. The junction between exon 1 and 3 is marked with \* indicating the lack of exon 2 within the DNA sequence. **(c)** Pictorial representation of results illustrating that the 200bp fragment is *PtgdS* mRNA (NM\_008962.2) and is lacking exon 2 sequence between 191-330bp within the mRNA sequence.
